# Supplementary material for: Insights into refractory chronic inflammatory demyelinating polyneuropathy: a comprehensive real-world study
Source: Frontiers journal article supplement (doi:10.3389/fneur.2024.1326874), 2024-01-31

Supplementary Figure 1

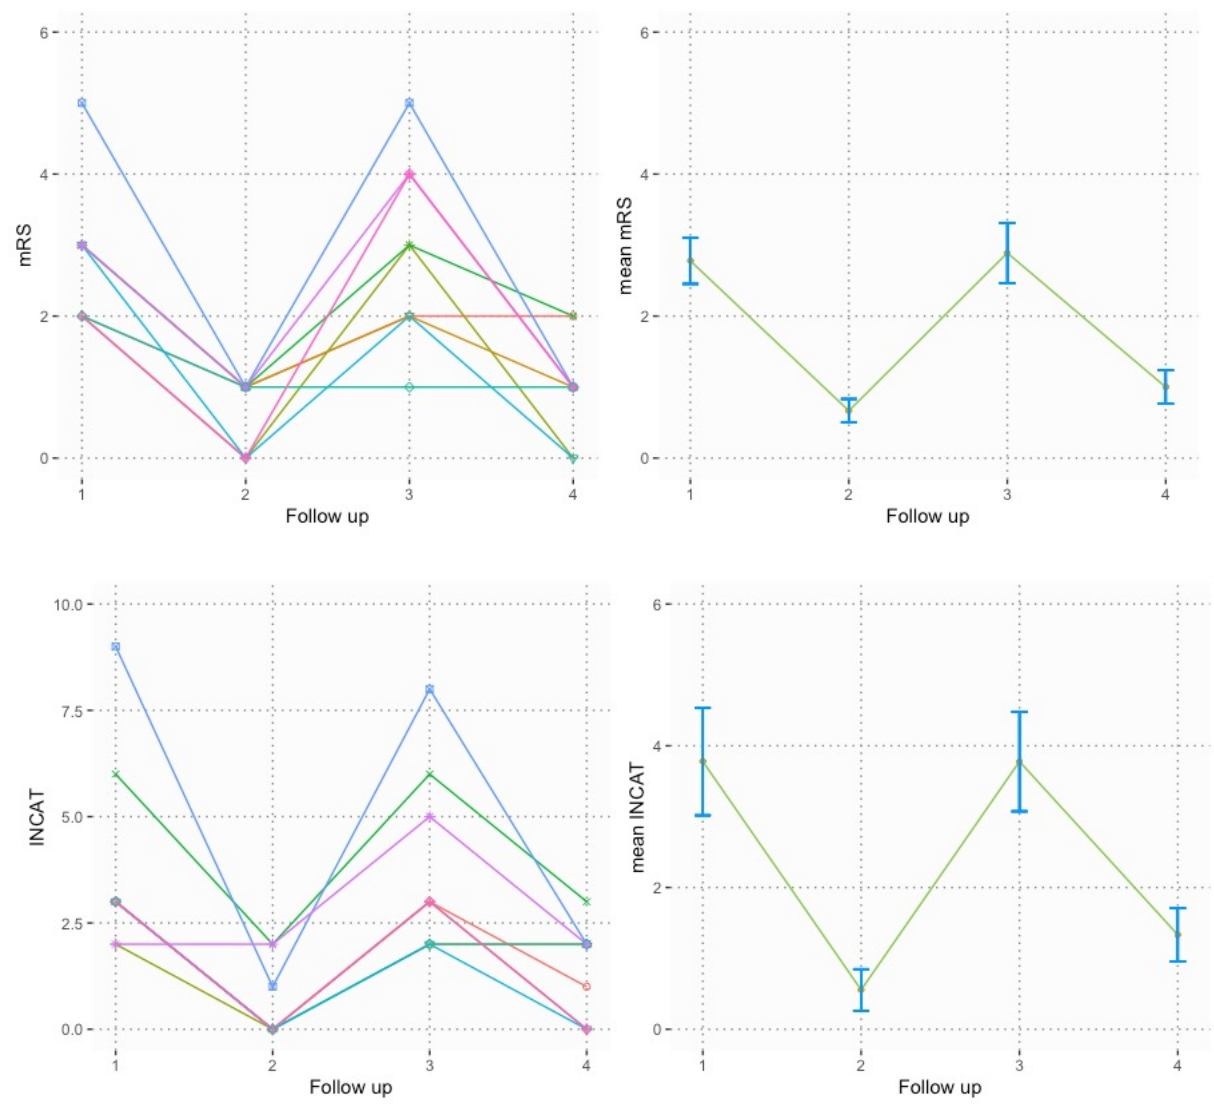

Supplementary Figure 2

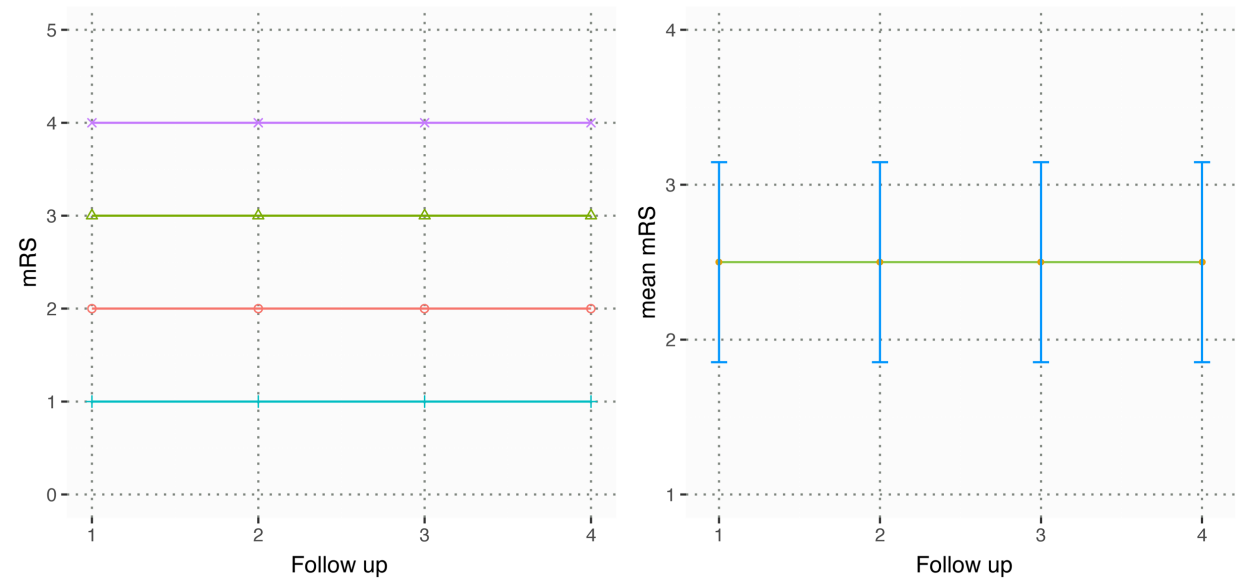

Supplementary Figure 3

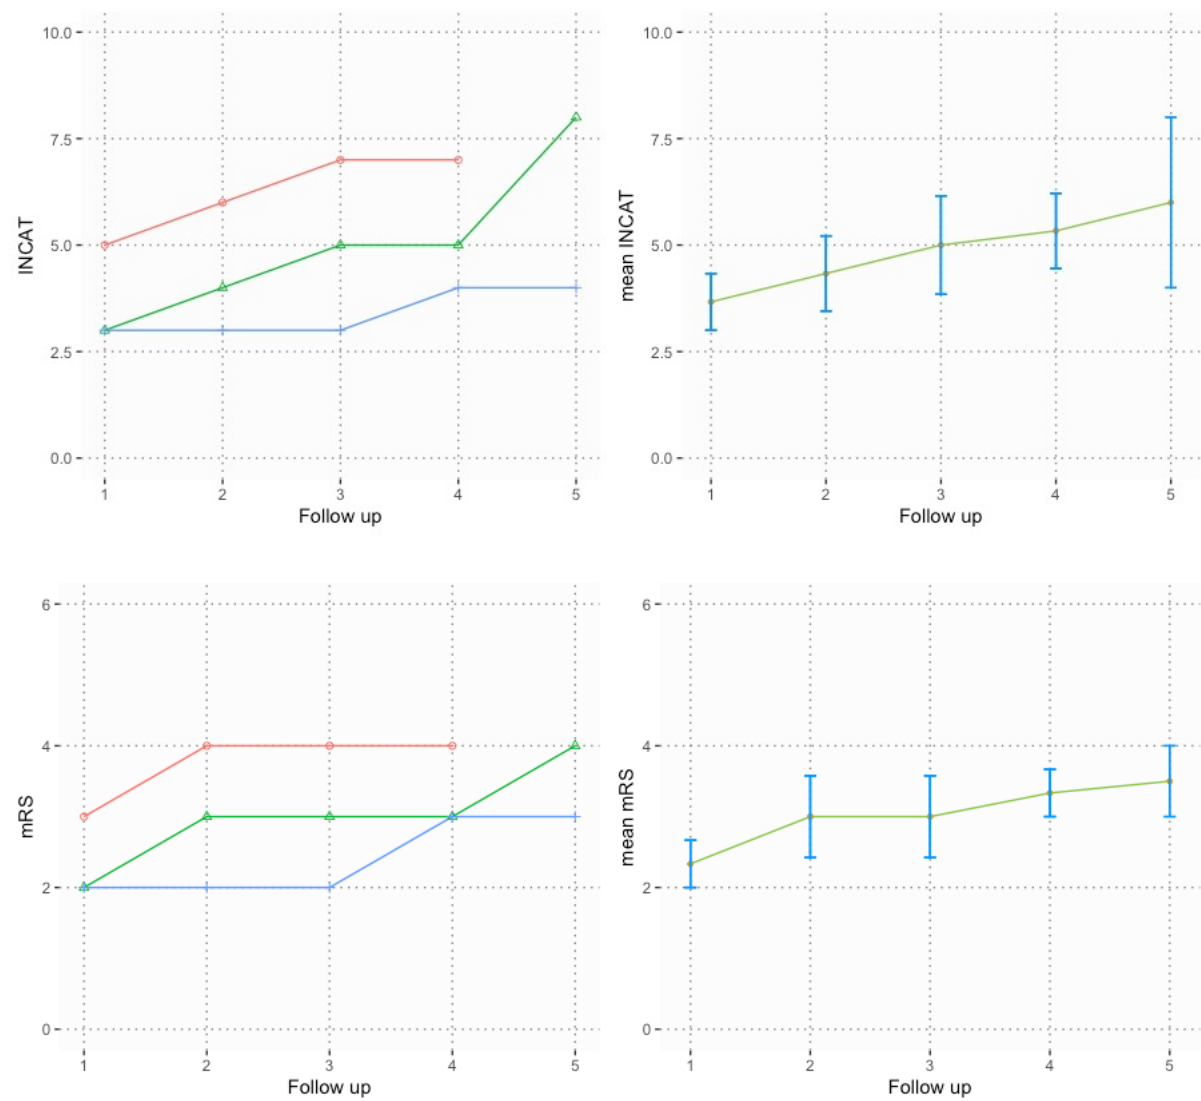

Supplementary Figure 4

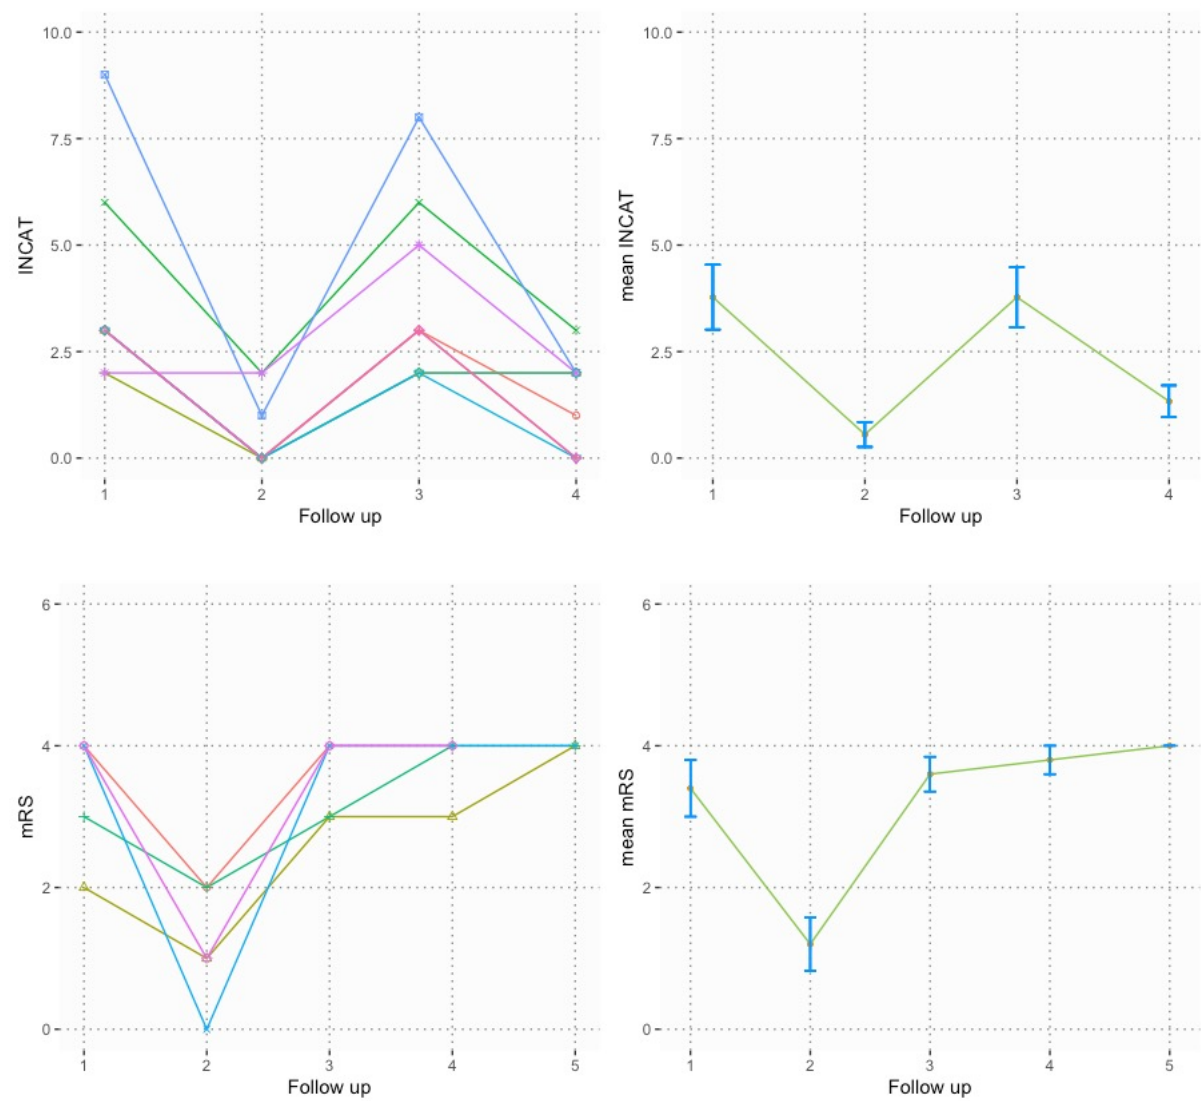

Supplement: Data_Sheet_1.PDF [file Data_Sheet_1.PDF]
